# Supplementary material for: Longitudinal Survey of Carotenoids in Human Milk from Urban Cohorts in China, Mexico, and the USA
Source: PLoS One. 2015 Jun 10;10(6):e0127729. doi: 10.1371/journal.pone.0127729 (PMC4465022; doi:10.1371/journal.pone.0127729)
Supplement: S1 File — Data set of carotenoid species concentrations (nmol/L) in 240 human milk samples from 60 donors at 4 lactation stages, and corresponding summary statistics (Table A). Mean (interquartile range) summary by country and lactation stage (nmol/L) (Table B). (XLSX) [file pone.0127729.s001.xlsx]

## Sheet: by sample nmol-L
Sample	Country	FamilyID	study week	Fat (g/L)	13- or 13’-cis-lutein	13’- or 13-cis-lutein	all-trans- lutein	all-trans-zeaxanthin	α-cryptoxanthin	β-cryptoxanthin	15-cis-β-carotene	13-cis-β-carotene	α-carotene	all-trans-β- carotene	9-cis-β- carotene	cis-lycopene isomers n	cis-lycopene isomers o	all-trans-lycopene	5-cis-lycopene	total lutein	total β-carotene	total lycopene	total carotenoids
6593	China	527	2	48.189	26.5819	116.688	543.906	155.738	63.1483	139.353	20.4621	18.3634	39.4048	178.388	8.39471	20.3637	7.52942	14.7166	14.5455	687.175	225.608	57.1552	1367.58
6763	China	528	2	38.2357	12.5744	65.8897	341.855	61.866	40.9636	34.5733	8.06622	10.4861	22.5949	72.7573	4.35576	10.7338	2.5256	16.2059	13.8908	420.32	95.6654	43.3561	719.339
6933	China	529	2	35.7633	19.3517	76.6833	470.047	66.0429	45.9559	108.88	10.4415	12.1817	14.8361	59.6903	2.08829	11.5788	2.49739	22.7035	15.3249	566.082	84.4018	52.1046	938.304
8546	China	538	2	49.733	1.66778	17.3449	81.3875	29.7315	22.0041	45.8012	7.38194	6.09813	11.8896	20.0917	0.962862	4.39659	2.93106	9.42125	11.7242	100.4	34.5347	28.4731	272.834
9141	China	542	2	36.8057	6.47727	45.3409	216.017	74.3419	38.2983	47.319	6.38838	9.81629	21.3488	81.6466	4.51861	17.7868	7.21636	21.954	20.3278	267.835	102.37	67.285	618.798
10161	China	548	2	24.0236	12.5437	39.7992	249.79	57.4404	32.5396	82.484	5.21535	5.9604	13.611	42.0208	3.57624	7.58165	3.49922	7.77605	9.03965	302.133	56.7728	27.8966	572.877
10842	China	552	2	39.1344	6.37078	17.8736	69.5476	27.6467	43.4106	25.7697	7.49233	7.15177	13.8257	21.7959	1.87308	6.22022	1.77721	4.22087	7.99743	93.792	38.3131	20.2157	262.973
11012	China	553	2	40.5869	2.79963	21.7383	120.549	26.9907	23.4984	17.7043	5.07081	5.38773	30.0747	47.8558	2.85233	6.40873	1.8606	6.40873	7.23567	145.087	61.1666	21.9137	326.435
11182	China	554	2	32.2774	5.73095	30.3403	140.577	28.9179	33.1113	27.5104	4.86568	9.73136	11.358	30.9782	3.40598	10.1566	3.06813	8.04061	13.7537	176.648	48.9812	35.019	361.546
11524	China	556	2	18.5171	5.10545	26.3441	134.375	20.7475	9.97921	7.98337	8.05661	5.10907	8.17681	15.5237	1.68992	4.10177	nd	3.84541	4.94776	165.825	30.3793	12.895	255.986
11692	China	557	2	36.75	8.4612	44.8641	231.798	56.9556	31.3461	50.9615	12.6857	9.65625	15.9496	62.103	4.9228	13.8328	4.07573	9.63355	12.9682	285.123	89.3677	40.5103	570.214
12541	China	562	2	53.6761	11.052	40.161	185.861	44.9073	50.3553	33.9252	11.5332	11.683	28.2751	77.2874	4.04411	11.9199	6.35076	11.7245	17.7821	237.074	104.548	47.7773	546.862
12882	China	564	2	55.9268	8.90985	48.5268	242.157	77.1612	37.1632	26.2786	9.03252	9.64489	22.219	77.6184	4.28662	9.18752	2.59647	19.9729	14.3805	299.594	100.582	46.1373	609.135
13051	China	565	2	45.1986	8.50115	79.5108	370.55	65.6622	60.4386	29.3233	6.25528	7.37803	11.2322	59.0242	1.9247	5.23125	2.511	8.22353	11.1112	458.562	74.5822	27.077	726.878
13222	China	566	2	32.2323	10.6516	64.632	300.593	95.6876	34.3	23.8194	6.77492	6.77492	14.6335	50.0302	3.64803	8.38541	3.17286	12.2382	16.9975	375.877	67.228	40.7939	652.339
15942	China	582	2	36.7085	19.2084	84.3857	468.883	117.07	78.6203	91.2958	14.0595	12.7957	29.6609	83.2513	8.37253	24.7312	9.48029	16.0753	27.7196	572.477	118.479	78.0063	1085.61
19001	China	600	2	59.5706	5.36861	39.6116	157.286	36.4357	35.5931	64.5214	6.98079	5.86386	18.846	47.609	2.23385	3.91612	1.91253	2.36789	3.73398	202.266	62.6875	11.9305	432.28
19511	China	603	2	30.8909	7.95034	51.0809	288.995	38.0997	44.6772	52.8357	10.9012	7.45873	19.0221	64.8336	2.48624	2.24557	1.37229	5.48917	4.99015	348.026	85.6798	14.0972	602.438
20021	China	606	2	46.305	5.05174	46.5372	246.923	63.677	48.7728	96.9471	6.33389	9.42718	10.7638	75.8593	2.94599	4.36225	2.05622	3.40141	5.76509	298.512	94.5664	15.585	628.824
20191	China	607	2	41.8989	7.69576	36.6465	226.475	30.0306	22.2053	65.3623	7.93395	5.2893	6.08398	30.149	1.58679	5.06038	nd	4.83036	4.60034	270.817	44.959	14.4911	453.95
6627	China	527	4	38.9411	6.20495	47.0375	225.38	67.5282	29.9296	53.5994	11.7485	7.31872	15.6377	99.3804	3.85196	6.58318	2.33678	8.2918	8.04053	278.622	122.3	25.2523	592.869
6797	China	528	4	39.3204	4.87615	35.3521	173.408	37.388	16.0836	43.932	5.27842	6.89127	9.67268	57.3295	3.37232	6.31246	nd	6.69503	6.69503	213.636	72.8715	19.7025	413.287
6967	China	529	4	25.6946	4.53361	40.6136	180.022	66.2643	17.9076	38.2152	6.72526	6.36174	9.9617	31.4451	1.09058	9.4853	nd	19.4449	15.8879	225.169	45.6227	44.818	447.959
8581	China	538	4	20.2423	4.44104	29.3792	130.498	34.543	17.695	61.0978	11.5049	4.10891	8.17362	28.3515	2.30099	1.71538	nd	3.32354	2.8947	164.319	46.2663	7.93362	340.028
9170	China	542	4	57.2648	6.83405	50.536	312.568	54.4688	36.5587	60.6382	8.13331	8.13331	19.3194	73.1998	2.24964	10.1593	2.93492	14.2231	14.6746	369.938	91.716	41.9919	674.631
10194	China	548	4	23.1143	5.2198	27.2777	179.325	34.536	22.8739	50.8491	5.34664	6.31875	13.4838	65.6178	1.62019	4.65021	1.05687	4.65021	6.76394	211.823	78.9034	17.1212	429.59
10873	China	552	4	24.6091	3.58193	18.3076	69.6486	31.2791	23.3377	13.4192	6.1273	5.55286	6.21872	6.1273	16.2756	1.74864	nd	1.24903	1.74864	91.5382	34.0831	4.74631	204.622
11044	China	553	4	29.0572	5.75144	30.4613	195.762	39.4036	22.9001	19.361	12.0931	4.91925	18.0983	48.1676	2.66459	2.13925	nd	5.21441	4.6796	231.975	67.8446	12.0333	411.615
11224	China	554	4	14.268	2.82598	18.0863	83.2722	26.9048	15.2823	13.0728	4.53203	5.43843	8.09538	19.5784	0.725124	7.09508	nd	8.27759	7.09508	104.184	30.2739	22.4677	220.281
11554	China	556	4	40.9958	10.9543	40.2255	246.202	38.0375	20.7094	12.4608	6.22058	5.01102	15.2574	29.2022	0.898528	3.15602	1.17224	4.28317	4.73403	297.381	41.3323	13.3455	438.524
11724	China	557	4	6.83018	2.98728	17.5722	111.056	33.5155	13.0519	23.6995	4.73434	4.56526	8.23711	22.15	0.676335	7.50005	3.41914	4.76473	3.86032	131.616	32.1259	19.5442	261.79
12560	China	562	4	21.9524	2.58843	14.0515	83.7543	22.8594	21.5025	13.9134	7.47193	7.11613	9.75011	44.6537	2.31274	4.87401	nd	7.19497	5.3382	100.394	61.5545	17.4072	247.381
12914	China	564	4	37.3053	4.20428	37.0741	198.557	63.7404	29.5093	17.9297	6.61983	4.96487	14.557	63.44	2.20661	5.39771	1.67929	15.3535	10.3156	239.835	77.2313	32.7461	475.549
13084	China	565	4	39.64	9.46349	47.6616	250.869	60.3581	56.5016	29.5961	5.96027	7.6159	8.90577	91.308	4.63577	6.1775	nd	7.62468	8.09987	307.994	109.52	21.9021	594.777
13254	China	566	4	25.6571	9.25527	55.9254	286.519	55.8662	26.366	14.8188	6.25288	5.87391	11.3462	37.5173	3.9791	6.42721	1.3596	7.41601	9.88802	351.7	53.6231	25.0908	538.811
15977	China	582	4	34.1645	5.35638	39.2801	213.281	57.0938	45.3686	51.238	4.3731	5.15402	13.4736	43.8872	2.96746	3.56577	2.24134	3.87141	5.09396	257.918	56.3818	14.7725	496.246
19015	China	600	4	25.4703	5.28326	22.5113	119.907	25.0983	28.0619	51.1848	7.736	2.87337	13.6839	38.459	1.65771	1.73015	1.58597	1.73015	1.29761	147.701	50.7261	6.34387	322.8
19535	China	603	4	27.9112	3.47736	23.7093	124.395	20.6031	28.7324	53.4485	5.32316	5.47525	10.4965	59.1631	2.43345	2.87709	nd	3.47235	2.2223	151.581	72.395	8.57173	345.828
20045	China	606	4	19.3107	5.96784	51.7855	229.281	83.5834	27.8452	51.5512	8.52095	3.51952	6.95607	46.1243	2.77857	2.34415	nd	1.18416	1.54666	287.034	60.9433	5.07497	522.988
20215	China	607	4	24.8177	4.72736	18.1531	111.377	13.774	16.2628	35.6672	5.64047	3.63901	4.15497	17.8312	2.18341	1.30557	nd	2.84851	1.42426	134.257	29.2941	5.57834	238.988
6670	China	527	13	32.1384	2.78548	27.112	148.002	38.8	28.8562	25.7709	7.14732	7.32601	16.1401	99.3478	3.03761	9.32453	nd	10.257	10.4901	177.899	116.859	30.0716	434.397
6839	China	528	13	7.985	1.31819	14.8767	67.2277	13.356	7.36161	7.54565	5.43596	4.52997	4.96536	36.2397	0.960353	2.60035	nd	3.07314	2.36395	83.4227	47.166	8.03743	171.855
7009	China	529	13	18.7633	4.60285	17.2001	90.8457	19.5038	15.6261	9.23359	4.66206	2.79724	4.49504	12.8207	1.98138	1.67261	nd	4.4096	3.55809	112.649	22.2613	9.6403	193.409
8464	China	538	13	14.4774	3.61353	23.4879	123.118	28.9438	18.4144	12.3604	10.9277	5.96059	7.30984	27.8161	1.7385	8.1003	2.91611	11.5024	10.5304	150.219	46.4429	33.0492	296.74
9210	China	542	13	21.2834	8.0164	23.7987	126.759	26.1711	15.669	38.6829	9.40088	6.02621	14.9233	38.5677	1.44629	5.66057	nd	5.66057	7.23295	158.574	55.4411	18.5541	328.016
10233	China	548	13	56.5127	7.8423	34.8198	285.146	55.02	37.8619	48.2855	8.1497	8.9043	27.1115	167.522	8.1497	7.67885	2.46117	11.026	8.76176	327.808	192.725	29.9278	718.74
10901	China	552	13	19.7291	4.12647	17.4229	76.5689	25.4877	36.2956	23.3009	20.7352	7.94115	21.0446	36.1764	0.88235	nd	nd	2.87782	2.87782	98.1183	65.7351	5.75565	275.738
11084	China	553	13	33.1197	5.69234	18.1312	118.696	20.0045	26.7857	33.5851	9.7374	5.07156	19.9713	4.8687	1.01431	2.91124	2.38192	3.44055	2.24959	142.519	20.692	10.9833	274.541
11253	China	554	13	8.30536	1.58631	11.8092	65.3911	14.0213	15.6754	9.81866	5.08792	5.25752	9.63916	21.7085	2.20477	4.86772	nd	3.09764	4.20394	78.7865	34.2587	12.1693	174.369
11594	China	556	13	38.3122	5.59638	28.1749	169.049	30.1483	22.632	60.352	7.42752	6.31339	9.04601	23.5824	2.59963	2.18027	nd	2.66477	2.42252	202.82	39.9229	7.26756	372.189
11764	China	557	13	20.0016	3.30513	16.0299	84.2808	25.0254	14.6971	56.5274	2.3852	4.45237	5.48711	28.3043	3.33928	2.90432	0.850551	3.83785	3.75487	103.616	38.4812	11.3476	255.182
12599	China	562	13	24.4242	2.03124	15.4036	92.2522	36.9897	20.1824	67.3298	4.72338	2.606	8.92649	32.575	1.71019	2.54988	0.934955	2.76237	3.03861	109.687	41.6146	9.28581	294.016
12952	China	564	13	17.7629	2.67532	15.8087	101.176	22.1449	19.0154	25.4331	14.7434	26.9126	0.950058	nd	nd	nd	nd	1.22124	0.915931	119.66	41.6561	2.13717	230.997
13123	China	565	13	16.3774	8.53947	37.5737	165.239	42.1506	45.2755	63.6361	15.4066	8.93583	12.7177	69.6378	1.93096	3.75195	nd	7.4235	4.36834	211.352	95.9112	15.5438	486.587
13291	China	566	13	36.8529	7.56242	37.4903	188.256	56.1346	27.3618	18.5557	4.79954	7.89602	11.4708	46.602	3.8706	12.1192	4.03972	10.5033	15.1489	233.309	63.1681	41.8111	451.811
16010	China	582	13	29.232	2.62216	28.516	151.266	37.3837	22.9038	47.7296	5.67697	4.96735	7.36213	33.1156	0.788468	2.46876	2.17251	3.29168	4.21746	182.404	44.5484	12.1504	354.482
19043	China	600	13	29.4352	0.512095	12.2903	57.184	13.252	13.5129	26.6921	4.59899	1.97099	3.0006	19.4636	0.739123	nd	nd	nd	nd	69.9863	26.7727	0	153.217
19564	China	603	13	15.4126	1.86937	23.4521	128.647	16.9395	18.7678	14.4495	5.8868	5.8868	6.80445	40.8806	1.79874	2.56001	nd	1.49334	0.853336	153.968	54.4529	4.90668	270.289
20072	China	606	13	32.2157	2.83065	21.7606	116.234	29.504	14.5237	34.9261	1.27674	1.53209	2.07326	21.7897	1.53209	nd	nd	nd	nd	140.825	26.1306	0	247.983
20245	China	607	13	23.8982	8.50441	34.7072	207.324	42.9579	23.8112	67.3901	12.1641	4.86564	8.52968	42.2426	2.43282	1.73122	nd	2.71224	0.981023	250.535	61.7051	5.42448	460.354
6700	China	527	26	22.8442	3.60471	20.2551	112.604	23.1973	26.1703	59.3864	5.94605	7.59773	13.4106	75.3167	2.47752	3.01674	nd	3.66318	4.09414	136.464	91.338	10.7741	360.741
6869	China	528	26	19.3502	2.21995	17.1253	95.7748	21.8848	17.3566	37.6576	3.05154	3.05154	4.02619	44.8576	2.28865	4.57826	nd	3.98109	3.58298	115.12	53.2494	12.1423	261.437
7039	China	529	26	35.0419	6.85867	26.0226	162.187	29.1947	25.8264	67.8191	5.43492	3.68798	4.53101	17.2753	nd	nd	nd	3.03879	4.81141	195.069	26.3982	7.8502	356.688
8481	China	538	26	25.1868	3.36695	23.232	130.975	24.5254	22.0468	44.9161	6.47951	3.72572	9.69987	35.6373	0.647951	4.43797	nd	6.12863	4.43797	157.573	46.4905	15.0046	320.257
9239	China	542	26	14.5987	4.3436	24.7947	173.563	30.7028	32.0147	124.345	9.22974	9.92632	20.5023	78.8882	3.65707	10.9053	4.08949	10.4509	8.40618	202.701	101.701	33.8519	545.819
10261	China	548	26	38.8094	8.67462	26.3956	187.496	44.3024	25.1912	146.908	10.4932	5.48511	12.8282	104.455	3.69648	3.11129	nd	2.02234	2.6446	222.566	124.13	7.77823	583.704
10921	China	552	26	9.33445	1.62586	11.0475	80.8759	16.5818	19.5565	18.5379	11.0313	4.81364	8.34599	37.7068	3.61023	1.83165	nd	1.02049	1.30832	93.5492	57.1619	4.16047	217.894
11114	China	553	26	29.512	5.40307	25.3944	140.48	38.4937	36.6113	36.0833	7.45182	6.41203	22.1614	66.5465	2.77277	2.26088	nd	2.71305	2.71305	171.277	83.1831	7.68699	395.497
11282	China	554	26	41.7809	10.8974	51.6689	267.551	57.265	58.3924	94.7499	15.1862	9.94337	11.0092	96.9027	3.97735	5.66064	1.06137	6.36822	6.60408	330.117	126.01	19.6943	697.237
11625	China	556	26	36.7236	8.84928	42.9822	284.125	44.8309	42.6247	114.593	12.0122	8.66701	11.4198	76.1785	3.49722	1.96387	nd	0.991855	0.773647	335.957	100.355	3.72937	653.509
11786	China	557	26	18.4867	5.27127	21.0851	119.552	35.1634	17.1035	70.4748	10.9558	3.95626	7.00101	24.752	0.608655	1.32344	1.32344	3.97031	2.1175	145.909	40.2727	8.73468	324.659
12619	China	562	26	32.0894	2.05852	21.0263	182.179	29.0309	35.0631	94.1242	5.80078	4.8104	7.03607	76.259	2.68816	2.39955	nd	1.10748	0.66449	205.264	89.5583	4.17152	464.248
12973	China	564	26	54.5174	9.41434	38.5684	222.756	61.9975	45.4101	41.7001	9.64311	9.78922	12.901	64.1413	2.92215	2.19207	nd	1.52492	1.90615	270.738	86.4958	5.62313	524.866
13143	China	565	26	24.5736	5.63659	26.4486	115.55	43.6344	29.8741	95.5548	11.8903	4.69354	7.30414	39.1128	0.938708	2.17717	nd	3.67397	2.31324	147.635	56.6354	8.16437	388.803
13310	China	566	26	55.6931	9.3064	53.1366	309.063	65.3149	47.2366	70.4148	8.23265	9.24368	21.9881	66.5834	1.80541	12.2479	8.29088	12.4363	26.0032	371.506	85.8651	58.9783	721.303
16025	China	582	26	20.6973	9.43716	58.5489	319.323	71.6214	49.6915	32.3747	13.1576	6.48616	17.3037	45.2178	4.81829	0.82202	nd	1.66822	1.90999	387.309	69.6799	4.40022	632.38
19062	China	600	26	17.4349	2.19143	11.505	75.6045	12.6022	17.3122	14.4566	4.39301	4.56873	3.56684	21.7893	2.46008	1.28379	nd	2.98022	2.98022	89.301	33.2111	7.24423	177.694
19584	China	603	26	10.3627	8.49347	26.468	138.858	22.907	22.0067	12.7407	4.0863	4.0863	13.5027	34.0208	1.52048	6.44686	nd	7.43868	9.42233	173.82	43.7139	23.3079	311.999
20092	China	606	26	19.7022	2.69789	12.2199	73.3192	19.1652	19.2322	17.216	6.26086	5.49734	8.67901	32.6787	1.22163	2.19142	0.796882	2.98831	4.38285	88.2369	45.6585	10.3595	208.547
20263	China	607	26	14.7946	6.59183	34.6422	239.129	57.1298	37.42	314.437	9.44672	6.47775	8.49193	84.4806	3.91364	7.30658	2.21838	6.33824	4.66565	280.363	104.319	20.5289	822.69
127	USA	4	2	36.5999	6.55325	25.3939	146.629	40.0408	31.4224	37.0264	5.71452	8.47325	21.7992	50.6425	1.57642	14.3964	5.14156	25.4507	26.7361	178.576	66.4067	71.7248	446.996
2833	USA	21	2	37.4743	5.3131	30.38	130.648	55.2319	32.6199	74.9591	8.38954	15.3371	26.8746	222.323	13.1087	33.0065	13.8524	38.308	42.2414	166.341	259.158	127.408	742.593
813	USA	37	2	25.2727	1.44409	11.9653	36.5149	20.5634	13.1052	4.43559	5.28023	2.97757	0.705133	13.6968	nd	2.58973	nd	3.36665	4.92049	49.9243	21.9546	10.8769	121.565
1099	USA	40	2	69.6054	17.1719	50.9791	289.955	82.4628	51.9202	114.154	8.60581	13.7693	45.4179	135.283	4.81925	36.3764	10.7782	40.6428	47.1546	358.106	162.478	134.952	949.491
1867	USA	43	2	35.2671	6.8912	30.6972	149.518	44.4324	22.8577	18.1637	6.63086	6.42992	13.0517	31.5468	1.20561	7.07788	3.40787	13.1072	16.7772	187.107	45.8132	40.3701	371.795
14483	USA	74	2	30.5066	8.56225	19.5709	77.0602	39.469	28.2917	18.7283	9.21958	7.84645	20.307	35.309	2.5501	22.0087	9.72479	31.6056	32.9619	105.193	54.9252	96.301	363.216
16871	USA	85	2	31.1829	1.56793	10.9755	53.8324	14.5268	12.7697	12.7697	6.37006	3.85556	15.8225	32.5208	0.670533	8.52919	3.38981	14.434	17.9332	66.3759	43.417	44.2862	209.968
10652	USA	89	2	35.1659	7.08955	15.712	85.4579	26.2615	22.2842	16.8536	2.02808	6.45298	15.344	27.1025	2.02808	13.4699	7.5768	14.6725	18.04	108.259	37.6116	53.7592	280.373
16836	USA	93	2	26.3353	7.20823	30.1966	132.476	64.0453	40.9353	44.5528	8.06065	11.8098	27.2063	109.287	7.49828	26.7793	12.3503	35.2166	35.828	169.88	136.656	110.174	593.451
10380	USA	101	2	18.7467	4.57859	9.89566	55.3862	20.8091	19.7753	51.6756	4.40562	5.54255	26.1069	58.1257	2.84233	20.0241	9.4558	20.5803	30.5923	69.8604	70.9162	80.6524	339.796
15587	USA	102	2	24.4966	1.82548	6.4594	20.642	9.01728	3.43089	7.82244	5.53979	4.0535	5.89671	11.8903	0.932306	5.112	3.17296	6.34593	8.46124	28.9269	22.4159	23.0921	100.602
6239	USA	111	2	30.7539	5.08878	17.7487	83.9028	30.0965	33.9641	31.4168	8.12107	12.7787	27.8782	66.5211	4.41882	32.5637	12.6204	26.9547	34.2776	106.74	91.8398	106.416	428.352
6791	USA	115	2	30.8157	4.84182	28.6687	153.791	51.9015	29.637	51.927	7.11095	7.96917	18.9136	41.1945	1.22603	16.9547	9.91687	23.5126	35.5888	187.302	57.5006	85.9729	483.155
14715	USA	126	2	20.8186	6.19862	14.8441	72.2629	23.4514	23.116	14.5073	6.1214	7.691	32.3381	65.7659	3.61006	12.2863	5.32406	15.9722	22.2177	93.3056	83.1883	55.8003	325.707
10421	USA	138	2	28.1232	2.3408	7.60758	25.3586	15.1437	22.8768	12.5823	5.25551	4.31703	8.38188	29.2807	7.50787	9.79491	7.83592	19.1001	24.2424	35.307	46.3611	60.9733	201.626
10907	USA	142	2	19.6245	2.02562	9.45288	43.0444	19.8997	15.5073	27.2203	6.82182	6.6594	17.9684	41.5806	1.46182	15.6807	6.35705	29.8781	27.971	54.5229	56.5237	79.8869	271.529
17119	USA	157	2	18.5419	8.15547	22.4826	108.005	34.0125	23.0496	32.0971	9.1199	7.42318	18.0814	26.9355	2.333	10.7912	5.53395	22.9659	24.3494	138.643	45.8116	63.6404	355.336
17134	USA	165	2	35.8198	11.5941	37.4577	183.721	63.4252	35.0389	66.94	8.92483	14.5887	34.49	36.0426	4.46242	38.0653	12.987	29.3326	47.4696	232.773	64.0185	127.855	624.54
17872	USA	166	2	15.4916	3.09365	9.11814	42.497	24.3449	15.4356	22.5964	6.11023	3.4468	6.83744	12.6905	1.41005	3.57696	2.45277	6.94952	7.97151	54.7088	23.6575	20.9508	168.531
20613	USA	173	2	29.9961	5.67296	21.3681	91.9019	31.3545	26.2428	49.5286	9.46164	11.0992	20.129	17.4676	2.54736	22.7886	10.9195	33.2334	41.3043	118.943	40.5759	108.246	395.02
274	USA	4	4	33.6312	5.62164	18.0695	111.83	32.5205	25.7045	35.1229	5.40926	8.30707	19.2149	44.0468	1.5455	14.24	5.29276	22.4312	25.7077	135.522	59.3086	67.6717	375.065
1393	USA	21	4	10.8142	2.29133	10.6929	44.681	21.7781	12.503	22.2068	6.24684	4.2258	10.0695	83.2299	4.40953	10.0673	3.23593	8.98868	13.4231	57.6652	98.1121	35.715	258.05
2217	USA	37	4	39.3964	3.3623	17.7081	58.5041	33.5148	13.3631	11.1725	7.00977	7.3333	4.37807	3.88233	1.07843	nd	nd	4.92427	5.48704	79.5745	19.3038	10.4113	171.718
1947	USA	40	4	32.9722	5.0227	13.1629	72.7426	25.5638	19.1272	32.33	5.16626	6.16618	17.0831	65.4948	4.08301	10.0013	4.5658	19.2416	17.1761	90.9282	80.9102	50.9848	316.927
2894	USA	43	4	39.7062	9.11648	24.8804	126.871	41.5037	19.6754	16.1487	4.93429	6.7618	10.5723	36.9158	1.71786	12.3979	5.48368	19.0737	18.3584	160.868	50.3297	55.3136	354.411
15224	USA	74	4	45.4676	6.77829	19.1776	81.3394	38.3458	28.9216	16.4804	5.72682	10.3401	22.6032	29.5886	4.93143	17.018	6.43363	22.6215	20.9612	107.295	50.5869	67.0342	331.267
17781	USA	85	4	50.9521	2.741	10.964	50.2036	17.9748	19.4566	23.9683	5.83014	7.07946	26.9089	78.8458	2.08219	16.2988	10.3226	24.2671	32.0543	63.9086	93.8376	82.9428	328.998
12286	USA	89	4	49.2244	8.57443	17.4988	79.0947	33.8787	28.389	23.7715	4.20944	12.1232	19.4814	31.1498	2.35728	19.1111	6.91955	29.2159	30.5339	105.168	49.8397	85.7804	346.309
17627	USA	93	4	27.0272	7.51983	13.617	54.468	32.9199	27.8078	38.2358	7.04018	7.82242	19.2524	62.5793	0.977802	9.95013	4.8475	12.7566	18.3695	75.6048	78.4197	45.9237	318.164
11560	USA	101	4	36.0313	12.1485	16.374	81.8701	35.437	36.823	85.3467	12.3672	10.1648	44.8765	110.966	6.77652	33.5949	11.493	38.2363	45.309	110.393	140.274	128.633	581.783
16510	USA	102	4	34.2138	1.48163	6.91425	32.2665	13.4116	11.3427	7.72271	5.22739	5.86101	6.59153	13.3694	0.950434	3.4512	3.09988	11.0562	9.65097	40.6624	25.4083	27.2583	132.398
7095	USA	111	4	34.7621	6.01529	17.2697	87.5128	30.3144	30.9111	21.0499	8.21528	11.7628	23.3081	54.7063	7.65515	20.9484	6.69863	23.1407	36.0508	110.798	82.3395	86.8385	385.559
7530	USA	115	4	32.1011	5.83964	24.104	115.302	50.8489	25.3785	45.1714	5.73857	7.05366	17.3512	39.3331	2.74973	16.689	11.308	23.3958	31.6623	145.245	54.8751	83.055	421.926
15466	USA	126	4	31.041	3.38221	15.9163	83.9583	28.6028	26.4437	17.8884	7.08317	7.46605	22.3437	55.5168	3.44587	11.9881	6.74331	14.7354	25.7245	103.257	73.5119	59.1913	331.239
11169	USA	138	4	18.4808	0.919896	3.4956	18.9498	7.22967	10.0691	7.91141	5.66491	4.77977	5.3901	12.0379	1.2392	7.39055	3.23336	16.6287	15.1275	23.3653	23.7218	42.3802	120.068
12198	USA	142	4	19.2829	2.12376	12.955	55.2179	28.7006	22.2087	38.8133	9.19589	6.948	15.97	34.5357	2.24788	10.6641	6.66507	13.8633	21.3282	70.2966	52.9274	52.5207	281.437
17766	USA	157	4	20.2248	7.17808	13.9784	88.7815	34.5799	15.3227	43.1989	7.27042	7.08866	18.4472	33.5348	2.81729	16.599	10.6708	18.496	33.1979	109.938	50.7112	78.9636	351.161
17598	USA	165	4	60.0271	15.6975	30.8993	145.574	53.5291	38.1111	71.3776	10.1756	15.5814	32.9188	36.8867	4.76983	26.3432	16.3867	33.6031	48.9527	192.17	67.4136	125.286	580.806
18202	USA	166	4	23.0912	2.26555	6.31118	32.0414	16.5957	12.8104	16.7643	2.02425	2.80281	7.2696	6.07275	nd	2.03144	1.21886	4.06288	5.48489	40.6181	10.8998	12.7981	117.756
20974	USA	173	4	30.0161	1.62309	12.6601	68.4945	26.9126	17.1317	30.4563	6.8718	10.6201	14.5827	15.3054	2.18648	13.0401	6.52005	15.2814	12.6326	82.7777	34.9837	47.4741	254.319
3600	USA	4	13	48.3081	8.77841	28.8712	151.379	56.8386	38.3206	89.9867	11.0747	10.1361	22.2893	30.9715	2.25247	25.9578	8.57096	26.9373	35.5083	189.029	54.4348	96.9743	547.873
5196	USA	21	13	13.9438	1.54907	15.026	116.18	29.9908	19.681	31.3382	5.81313	5.81313	17.5483	104.785	6.2603	13.8066	6.02824	15.1678	21.1961	132.755	122.672	56.1988	410.184
4849	USA	37	13	12.8947	1.8474	8.73315	38.1236	20.6036	10.997	6.56539	2.58561	2.74721	nd	9.69602	0.969602	nd	nd	3.1624	2.74075	48.7041	15.9984	5.90315	108.772
5653	USA	40	13	41.891	9.05238	19.0285	125.81	33.2882	35.0269	48.7487	7.82157	11.1991	33.9181	121.057	3.73302	26.67	6.49356	34.7869	32.2359	153.89	143.81	100.186	548.869
6450	USA	43	13	35.3742	2.77963	14.0967	51.2246	29.115	11.0603	10.2841	7.83281	6.11341	5.42905	4.20297	0.764176	6.35561	2.36778	17.696	13.4589	68.1009	18.9134	39.8783	182.781
18321	USA	74	13	39.9114	8.19023	19.7634	78.8755	46.7579	28.5374	27.6674	5.82495	8.73742	19.6482	23.2998	2.91247	16.9867	5.81125	26.1506	24.8096	106.829	40.7746	73.7582	343.973
19582	USA	85	13	40.3578	1.55634	12.2778	69.1708	20.7176	21.9705	23.4915	3.66067	8.65249	25.3315	71.7158	3.16149	12.1565	7.01171	16.8672	23.5533	83.005	87.1905	59.5887	321.295
15921	USA	89	13	24.6187	4.62331	11.2026	51.0342	21.815	19.9853	19.2901	4.96195	4.61974	13.5451	24.1253	1.88212	9.0405	3.57156	12.7237	15.4023	66.8601	35.5891	40.7381	217.823
19704	USA	93	13	94.1025	10.1734	37.5758	163.102	100.966	44.2604	47.628	8.99959	16.7361	35.4939	74.9966	5.84184	29.8675	14.1098	47.4791	45.3163	210.851	106.574	136.773	682.546
15698	USA	101	13	30.7859	3.75642	10.0171	62.4505	23.702	29.0636	60.4216	7.37961	14.3074	41.7284	98.3446	8.43384	26.525	7.85925	25.739	42.8329	76.224	128.466	102.956	462.561
18780	USA	102	13	17.3736	1.67047	9.35464	49.2789	14.5696	15.3461	13.2238	6.42945	8.35828	13.8664	25.3963	2.08957	10.0027	4.48757	11.3238	14.4693	60.304	42.2736	40.2832	199.867
11135	USA	111	13	26.3952	3.80345	12.4669	73.956	27.543	31.8023	24.368	9.1494	10.9793	22.4926	68.7222	2.64316	17.7721	6.89663	22.2814	34.4832	90.2264	91.494	81.4333	369.36
11911	USA	115	13	7.80898	2.74055	9.48651	43.2163	17.1743	24.1053	26.7837	7.50534	4.86833	9.47019	55.7829	1.21708	3.17566	nd	5.02812	8.46841	55.4434	69.3737	16.6722	219.023
18347	USA	126	13	42.2393	8.31876	11.3746	77.5852	24.57	15.4304	11.2825	3.59385	5.06406	13.2635	53.4177	2.287	4.26237	3.62301	6.60667	8.73785	97.2786	64.3626	23.2299	249.418
15117	USA	138	13	20.061	1.47962	5.49573	20.926	13.5735	18.7986	14.4605	7.32199	5.69488	10.734	18.5084	4.06777	5.30689	2.3881	11.1445	15.2573	27.9014	35.593	34.0967	155.158
15808	USA	142	13	15.447	2.97149	7.72586	40.6103	14.0121	14.7139	14.7139	7.6246	5.52784	25.7301	41.5541	1.71554	6.71435	4.72492	13.3044	17.1589	51.3077	56.422	41.9025	218.802
19732	USA	157	13	35.7901	6.03002	24.3146	145.888	47.7269	32.3176	55.3201	6.36372	9.91992	27.1644	43.423	1.87168	16.5068	14.1626	24.6625	40.7786	176.232	61.5783	96.1104	496.45
19656	USA	165	13	55.4119	6.29902	26.2175	130.407	48.6243	35.2728	86.8509	10.8116	13.4326	32.5862	32.271	1.63812	21.1575	7.0525	24.3632	34.6214	162.923	58.1533	87.1945	511.605
19848	USA	166	13	13.1144	1.23656	8.24376	29.2653	12.4443	20.746	11.2794	7.33739	3.96616	8.05067	2.97462	0.991539	3.49267	nd	3.36331	5.17432	38.7457	15.2697	12.0303	118.566
22275	USA	173	13	11.3322	2.83292	8.49876	38.8277	15.1731	16.1233	24.4292	7.85699	9.6208	11.5545	15.0726	3.04659	13.8066	5.85735	10.4596	20.7099	50.1593	35.597	50.8334	203.87
10239	USA	4	26	38.7709	2.98192	17.3324	98.7759	34.8318	34.0604	69.76	7.89047	9.86308	20.0205	33.7138	3.7659	16.3769	7.72053	24.6823	31.584	119.09	55.2333	80.3637	413.36
13077	USA	21	26	18.9198	4.21813	23.1216	133.418	40.7278	18.1692	25.6507	5.11105	4.66007	31.5816	98.0119	3.15682	7.84467	4.78525	11.8651	15.7874	160.758	110.94	40.2824	428.109
11212	USA	37	26	20.2492	0.710252	2.36751	16.5726	4.76515	4.16482	12.2631	9.97792	3.87271	6.82056	7.40371	2.84758	nd	nd	3.56641	2.8234	19.6503	24.1019	6.38981	78.1557
11627	USA	40	26	30.1404	4.11024	12.4951	101.441	22.0608	15.5859	32.7785	5.69514	5.37874	28.4189	84.6361	3.95496	9.90664	4.54054	14.0344	14.6536	118.046	99.6649	43.1352	359.69
12902	USA	43	26	23.2596	1.04691	9.07324	47.6345	14.2149	16.7116	7.84422	3.69366	6.88363	14.6543	25.3519	2.01472	7.00918	5.14737	9.41858	14.0184	57.7547	37.9439	35.5935	184.717
21785	USA	74	26	29.5388	16.1654	29.9993	128.546	62.2725	45.2692	44.5097	4.33738	18.2469	43.2619	50.5529	8.22606	40.3908	13.4636	34.9273	49.3666	174.711	81.3632	138.148	589.536
21669	USA	85	26	37.2069	1.14418	13.5394	69.4134	21.3842	25.9053	20.1279	6.05523	5.50475	24.2098	48.4418	1.83492	10.533	3.5908	16.0389	22.7417	84.097	61.8367	52.9044	290.465
19161	USA	89	26	7.58731	2.49772	8.83808	48.033	19.1514	14.2707	17.6506	8.50418	4.80671	8.8187	15.7143	0.924368	7.71806	3.61784	12.1801	12.783	59.3688	29.9495	36.299	185.509
21826	USA	93	26	14.4349	4.94131	19.1276	88.9435	40.4848	23.3671	36.4526	4.60125	9.66263	21.6372	52.3009	5.82825	23.9115	8.48407	20.4098	28.8138	113.012	72.393	81.6191	388.966
19008	USA	101	26	29.4246	9.29227	14.3192	79.0605	34.7484	36.028	72.9492	6.30282	6.15625	38.0837	89.2656	7.91517	33.0823	12.1429	36.3332	32.8911	102.672	109.64	114.45	508.571
21182	USA	102	26	23.8013	3.33671	9.6589	43.9041	15.8219	12.3575	8.58159	4.39353	8.11113	8.06064	24.8403	2.53473	9.25918	4.98232	11.596	13.999	56.8997	39.8797	39.8365	181.438
17234	USA	111	26	5.24558	2.48691	4.14486	32.9516	9.73289	12.7601	10.9372	6.38123	6.78006	2.42866	15.3548	3.58944	6.37388	2.86174	9.3657	7.54459	39.5834	32.1056	26.1459	133.694
17395	USA	115	26	15.2124	2.57949	11.5085	78.9721	27.005	16.6771	41.4989	9.5463	7.82797	11.4327	69.1152	2.86389	3.73628	2.49086	6.97439	12.4543	93.06	89.3534	25.6558	304.683
20930	USA	126	26	26.3165	55.664	7.86388	72.7795	51.4295	27.7279	61.4836	16.4689	24.3324	18.0699	218.843	6.82495	15.8723	6.38762	26.3247	34.2609	136.307	266.47	82.8455	644.333
19091	USA	138	26	16.9718	3.04532	5.6556	23.71	13.5514	12.7553	11.6923	7.74429	5.44194	9.98412	21.5584	1.25583	3.0037	3.54982	12.2879	12.834	32.4109	36.0005	31.6754	148.07
19245	USA	142	26	16.4889	1.93412	6.87688	35.8887	13.5941	19.3224	11.7615	9.30526	4.13567	16.7895	29.1565	0.827135	4.31638	2.96751	10.7909	11.3305	44.6997	43.4246	29.4053	178.997
21918	USA	157	26	18.0619	4.68439	12.4917	68.3141	26.7513	22.3183	24.7981	3.75618	7.51237	14.4865	24.4152	1.78419	11.7609	3.67529	15.3137	21.0717	85.4902	37.4679	51.8216	263.134
21861	USA	165	26	16.0523	6.25386	19.9776	111.18	34.4653	26.1456	52.9704	4.01173	7.02053	23.7509	44.4633	2.00586	15.9194	5.99703	19.8447	23.7701	137.411	57.5015	65.5312	397.776
22313	USA	166	26	9.92641	1.7777	4.74054	20.7399	10.9802	14.4781	9.36248	5.89187	3.80121	7.33005	6.08193	nd	24.2997	1.73569	7.68664	8.55448	27.2581	15.775	42.2765	127.46
23212	USA	173	26	18.3541	4.25871	20.3257	94.0788	37.8488	23.9509	50.3234	6.14673	8.56817	22.8743	28.3122	3.53903	20.7769	13.3652	23.5714	36.2076	118.663	46.5662	93.9211	394.148
100312	Mexico	309	2	34.7591	3.75098	16.1581	64.3437	29.7287	14.8045	5.97819	18.8793	3.19282	9.29869	5.96918	nd	2.01026	2.26381	1.64805	2.71657	84.2528	28.0413	8.63869	180.743
100703	Mexico	364	2	36.7023	9.64298	30.9662	115.987	57.9267	46.3245	121.851	12.9379	17.1198	34.8831	65.4734	6.92633	30.0071	10.5707	19.7774	31.03	156.596	102.457	91.3851	611.424
101143	Mexico	445	2	23.0897	21.5096	45.7321	214.515	101.593	35.4147	95.2599	16.0355	11.9334	29.9001	68.99	6.15316	18.2444	9.73033	17.2713	27.9747	281.757	103.112	73.2207	720.257
102265	Mexico	703	2	30.6009	4.50257	10.506	54.1976	14.3848	15.9719	34.0624	9.14632	8.02308	14.9827	38.9922	2.72785	12.3511	8.37365	14.6539	27.633	69.2062	58.8894	63.0117	270.509
102683	Mexico	760	2	47.4024	5.96752	28.3457	118.024	49.887	28.6746	75.1696	11.0056	12.6007	25.4154	44.1821	3.34954	28.8204	13.942	19.1442	35.1671	152.338	71.1379	97.0736	499.696
104649	Mexico	963	2	50.7928	11.2026	64.4951	300.39	101.389	50.9885	60.3729	9.23949	18.017	50.4814	58.5168	8.16155	59.2655	26.7197	35.1575	63.8862	376.088	93.9348	185.029	918.283
104924	Mexico	968	2	31.5426	6.32143	39.7878	166.96	50.43	51.2411	101.755	16.6377	17.5322	31.7747	63.6886	5.72481	27.1907	10.6196	27.5408	37.8103	213.07	103.583	103.161	655.015
105789	Mexico	983	2	5.61057	1.44206	9.01285	54.0771	18.1404	14.4457	16.3835	6.41754	6.41754	12.6745	17.5181	4.85652	6.44904	1.58397	7.24103	11.0878	64.532	35.2097	26.3619	187.748
105837	Mexico	984	2	19.0841	3.90387	17.3722	72.6119	26.3785	18.6949	29.5685	7.32494	6.38585	13.7247	16.7159	2.62947	12.2516	4.41058	11.5165	14.8244	93.888	33.0562	43.0031	258.314
105986	Mexico	987	2	5.36374	2.10039	4.77361	21.0039	11.8956	6.3448	34.5232	7.71668	3.67461	8.39123	24.2524	3.30715	9.10853	nd	5.51306	7.19095	27.8779	38.9509	21.8125	149.796
106214	Mexico	992	2	6.37473	1.88992	9.86956	40.1082	15.6986	15.5972	31.3996	8.28436	4.64732	14.7652	12.9317	1.21234	2.10886	nd	4.87674	4.74494	51.8677	27.0757	11.7305	168.135
106260	Mexico	993	2	19.7724	2.33883	11.2264	44.9056	27.0491	14.4765	69.6397	5.7012	4.95105	13.2475	25.0553	2.25048	5.87202	2.44668	8.41656	12.4291	58.4709	37.958	29.1644	250.006
110893	Mexico	997	2	30.206	1.99658	24.685	128.325	25.3987	16.6745	34.7682	8.03389	4.89019	12.7624	16.0678	1.22255	3.64562	2.05066	7.06339	12.0761	155.007	30.2144	24.8358	299.661
107746	Mexico	1003	2	27.7043	5.95167	30.089	129.283	49.2791	33.9303	52.6728	8.27207	7.47668	22.1189	29.7476	1.90894	12.3484	7.26377	16.1878	24.9044	165.324	47.4053	60.7044	431.435
107865	Mexico	1005	2	37.879	10.82	70.4938	362.305	77.6204	33.6461	114.99	6.94081	3.84899	37.3031	85.8136	5.83659	20.9914	11.3189	20.5798	28.4001	443.619	102.44	81.2901	890.909
108305	Mexico	1014	2	40.4121	18.0624	49.2455	236.685	95.3779	41.7999	78.7703	14.1007	15.0845	44.4311	74.4388	9.91971	26.9524	11.1232	22.7812	35.0809	303.993	113.544	95.9377	773.854
108425	Mexico	1017	2	14.7803	5.22458	25.3489	116.682	47.8491	37.6334	77.7252	6.51674	5.39958	22.1096	58.4645	1.39644	16.275	5.58693	23.5623	26.4772	147.256	71.7772	71.9014	476.252
108620	Mexico	1023	2	35.7534	29.6232	31.8292	94.542	109.34	26.3331	99.0187	9.24865	7.73248	20.9276	30.4751	3.18396	14.2418	10.0879	15.2308	22.4506	155.994	50.6401	62.0111	524.265
108669	Mexico	1024	2	10.7496	2.05085	13.184	47.6091	17.4098	9.5921	27.4878	7.04776	4.65152	11.0155	24.6672	nd	1.23208	1.17691	3.31007	5.70067	62.844	36.3664	11.4197	176.135
109094	Mexico	1035	2	58.4981	15.0549	42.7645	198.986	82.1837	47.978	288.295	14.0662	6.2983	13.4238	43.0384	2.09943	11.2297	6.02571	10.6819	13.4209	256.805	65.5023	41.3583	795.546
100331	Mexico	309	4	46.6776	3.87499	21.3125	99.1646	42.3729	30.2966	107.415	4.74549	7.79616	18.2331	45.0821	3.05067	13.5982	4.75384	9.72879	12.161	124.352	60.6745	40.2418	423.586
100716	Mexico	364	4	30.6779	3.4859	11.1549	52.0561	25.1691	12.2645	24.7561	11.6279	5.36673	11.3475	13.4168	0.514311	5.25115	2.9173	11.6692	8.46018	66.6969	30.9258	28.2979	199.458
101162	Mexico	445	4	28.1916	7.36716	21.3459	101.251	53.5911	16.9846	10.8923	7.45236	5.27118	14.7582	34.1718	0.999707	8.89252	4.74268	8.29968	14.228	129.964	47.8951	36.1629	310.248
102287	Mexico	703	4	16.3347	1.22765	5.43672	26.8329	6.05124	14.0547	14.5689	4.55632	4.38757	7.70717	12.9939	nd	7.70552	3.74268	11.8885	18.4932	33.4972	21.9378	41.8299	139.647
102706	Mexico	760	4	64.0998	2.43791	14.815	75.7627	17.7941	18.5109	30.7905	8.66144	10.6464	20.3284	23.9994	2.43603	8.71032	3.53121	14.8311	23.7768	93.0156	45.7432	50.8494	277.032
104667	Mexico	963	4	26.3944	10.8033	29.529	113.075	49.7008	27.8032	57.718	8.48938	7.10336	17.7596	31.8785	1.55927	12.4316	6.55483	19.2124	26.4453	153.407	49.0305	64.6441	420.063
104945	Mexico	968	4	25.2971	2.57796	7.30423	68.5309	15.4427	11.7575	30.4436	14.2633	9.71557	16.1545	17.1573	nd	9.43891	4.31493	11.3267	17.5294	78.4131	41.1361	42.6099	235.958
105807	Mexico	983	4	1.01781	0.820677	2.6672	12.105	5.506	7.82005	12.2314	4.3432	2.42824	2.80509	6.90964	nd	nd	nd	2.13771	1.67411	15.5929	13.6811	3.81182	61.4483
105861	Mexico	984	4	10.6026	2.4919	5.87378	20.8252	11.0888	11.1331	8.61076	3.08284	1.19888	0.521472	8.2209	0.685075	nd	nd	1.89924	1.6758	29.1909	13.1877	3.57504	77.3077
106007	Mexico	987	4	18.4346	4.98248	14.3496	55.6045	37.6303	18.5038	86.4811	13.0404	4.60248	14.2081	30.875	1.68758	6.25466	4.50336	9.00672	12.5093	74.9365	50.2054	32.2741	314.239
106226	Mexico	992	4	11.8609	4.49809	8.22064	41.2583	23.191	8.94364	46.6888	5.37288	3.58192	6.05894	17.7603	2.2387	3.69949	nd	7.59368	7.78839	53.977	28.9538	19.0816	186.895
106280	Mexico	993	4	13.49	2.31431	6.75007	30.8575	17.3754	13.5708	36.5658	7.60849	5.19605	8.28704	7.42292	nd	3.38943	2.17892	4.35783	6.77885	39.9218	20.2275	16.705	152.653
110906	Mexico	997	4	29.9376	2.95983	19.2389	84.8486	31.6779	16.874	26.9983	3.87646	3.16446	6.42335	8.2276	0.949338	2.37384	nd	5.36694	6.19262	107.047	16.2179	13.9334	219.172
107766	Mexico	1003	4	19.1172	3.6701	22.4284	102.559	47.0964	20.7239	36.8646	8.24003	5.88574	19.3145	19.6191	1.76572	9.21437	2.30359	15.3573	14.5894	128.657	35.5106	41.4647	329.632
107879	Mexico	1005	4	19.6516	6.38312	24.7588	122.633	35.224	24.197	17.2026	8.37541	8.37541	15.4896	44.2966	1.48896	12.1408	3.52083	19.1825	17.2399	153.775	62.5364	52.084	360.509
108328	Mexico	1014	4	21.1895	6.6231	21.6355	117.45	45.0698	29.9908	35.169	10.6215	7.8599	14.2295	39.2995	15.0825	7.75991	2.35569	11.3627	13.3027	145.708	72.8634	34.781	377.812
108440	Mexico	1017	4	29.2995	2.48354	16.3204	95.6163	29.7541	18.8974	35.3676	3.49923	1.79229	9.61486	30.5201	0.85347	12.0253	6.68071	19.9308	23.1598	114.42	36.6651	61.7966	306.516
108645	Mexico	1023	4	28.6848	11.9149	21.8657	80.5236	64.7535	21.4976	109.023	13.1026	9.32297	17.2619	17.89	2.77169	20.8084	7.29775	21.8111	20.5455	114.304	43.0872	70.4627	440.391
108688	Mexico	1024	4	7.02761	0.681933	4.22799	18.2758	7.45097	3.19901	28.2579	5.90553	2.36221	5.86046	13.2546	nd	1.02726	nd	1.88331	2.39695	23.1857	21.5224	5.30752	94.784
109109	Mexico	1035	4	13.44	1.59575	7.97873	48.0851	10.3661	16.8084	64.8075	5.63002	4.26516	2.59728	17.2313	1.87667	3.7838	2.44834	4.45153	6.12085	57.6596	29.0031	16.8045	198.047
100343	Mexico	309	13	21.5902	2.62003	13.1002	54.4161	25.3047	16.1514	30.727	5.62388	4.46032	6.69189	15.902	1.74534	3.03601	2.53001	3.79501	6.19851	70.1363	27.7315	15.5595	192.302
100735	Mexico	364	13	3.13762	0.916052	3.20618	11.3361	3.73143	6.93832	7.38596	11.8995	4.62758	6.26217	3.08506	5.72939	0.574974	nd	2.52989	1.60993	15.4584	25.3415	4.71479	69.8326
101176	Mexico	445	13	51.0761	5.19741	29.6755	151.731	62.0267	20.9734	40.7997	6.93695	6.77562	20.139	36.4593	2.25854	11.5757	8.62913	17.6792	29.6758	186.604	52.4304	67.5598	450.533
102298	Mexico	703	13	25.8566	2.73808	6.12041	29.3135	8.95346	11.8057	14.3242	5.73421	5.57923	6.9208	11.4684	0.836884	5.45907	nd	12.1313	10.1094	38.172	23.6187	27.6997	131.495
102719	Mexico	760	13	31.4514	6.62907	14.3048	57.0449	25.4143	11.0819	39.5539	10.4072	5.87505	15.1623	22.3252	4.02861	7.00773	3.28487	12.0445	11.3876	77.9788	42.6361	33.7247	245.552
104677	Mexico	963	13	37.5376	3.07061	29.1708	131.115	53.2683	58.9684	57.0178	5.17055	7.23877	16.3428	29.1028	1.77276	17.924	7.32379	23.1277	31.6079	163.356	43.2849	79.9835	472.222
104959	Mexico	968	13	23.3264	3.20232	13.4192	45.8999	36.2462	9.23994	86.8853	6.45613	5.57575	7.29706	30.0797	2.64114	5.55138	1.91427	9.76277	11.007	62.5214	44.7527	28.2355	275.178
105816	Mexico	983	13	3.0808	1.36179	5.90109	31.7751	10.224	6.21083	11.5344	11.7931	6.77011	9.97421	12.885	1.96551	3.13408	2.27933	7.97765	9.40224	39.038	33.4138	22.7933	133.189
105873	Mexico	984	13	11.3691	4.42423	8.84847	42.7676	20.5961	15.4423	19.1485	6.89243	6.89243	10.9044	13.7849	2.02719	4.49599	nd	8.72752	9.25646	56.0403	29.5969	22.48	174.208
106020	Mexico	987	13	2.73091	2.97118	5.57096	24.1408	14.2385	10.7076	16.8781	6.61128	6.07523	7.79801	20.0125	2.32288	5.12849	2.09802	6.76028	12.1219	32.683	35.0219	26.1087	143.436
107238	Mexico	992	13	31.5485	3.91325	13.9516	84.3901	42.8876	19.1223	99.2697	7.36711	8.67682	15.7848	47.1495	2.61942	10.252	6.19393	13.0286	17.3003	102.255	65.8129	46.7748	391.907
106298	Mexico	993	13	22.1617	2.31881	10.7022	69.3859	23.5921	11.5053	57.1779	6.17873	5.4922	7.49026	13.3872	1.25291	5.59783	1.23152	6.38153	8.73262	82.407	26.3111	21.9435	230.427
110915	Mexico	997	13	7.95195	5.09349	10.3907	54.8059	21.48	9.35849	14.3364	5.29315	3.92085	4.57625	8.72389	1.64676	4.73157	2.55761	4.09217	5.24309	70.2902	19.5846	16.6244	156.25
107785	Mexico	1003	13	9.59799	4.41432	9.52563	46.6988	24.9399	13.6237	26.7932	11.1778	6.70666	10.6639	19.2257	1.11778	3.2082	2.33323	6.70804	8.31214	60.6388	38.2279	20.5616	195.449
107897	Mexico	1005	13	31.1093	6.71777	24.059	97.9544	60.6426	24.5819	44.8886	4.50975	4.2091	13.7311	34.7251	2.70585	9.80583	3.72622	7.25632	12.9437	128.731	46.1498	33.7321	352.457
108341	Mexico	1014	13	3.76407	1.26004	7.14024	38.6413	11.0704	15.5984	3.69436	2.82902	2.62695	6.15265	9.49744	nd	3.6908	nd	7.90885	9.22699	47.0416	14.9534	20.8266	119.337
108451	Mexico	1017	13	1.8634	2.89	7.32133	33.9093	17.358	10.7328	13.7455	4.07853	4.63469	6.02092	15.3872	1.20502	3.38604	4.11162	4.8372	6.53023	44.1206	25.3054	18.8651	136.148
108655	Mexico	1023	13	34.1146	8.1487	15.6706	66.4433	36.3468	19.6032	27.1076	5.57907	8.14242	11.6307	16.4356	1.96021	8.65558	2.55733	15.344	14.9505	90.2626	32.1173	41.5074	258.576
108702	Mexico	1024	13	23.9986	4.93342	19.2051	84.0444	33.9432	14.1201	42.0158	8.47686	4.23843	13.7653	22.2094	1.69537	7.29899	2.65418	9.5108	11.2802	108.183	36.62	30.7442	279.392
110858	Mexico	1035	13	28.0885	0.873856	8.38902	56.4511	15.4107	10.2483	90.8686	4.37238	3.02703	5.63236	21.1892	1.00901	6.91096	2.69857	8.55643	11.628	65.714	29.5976	29.7939	247.266
100357	Mexico	309	26	5.3744	0.498951	4.65688	15.8001	5.10097	13.0035	21.4557	4.80101	4.00084	5.68475	9.76206	0.960203	1.2527	nd	2.92296	2.92296	20.956	19.5241	7.09862	92.8236
100755	Mexico	364	26	17.7487	4.23524	17.711	87.015	33.0274	12.0412	24.8349	6.48333	5.18667	8.08408	12.411	0.518667	3.86664	2.41665	6.52496	6.40412	108.961	24.5996	19.2124	230.761
101188	Mexico	445	26	34.6624	3.34626	20.2635	108.939	58.2642	11.4462	29.9781	7.87073	6.61857	12.89	18.0669	1.25216	8.28465	3.03382	9.33482	17.7362	132.549	33.8084	38.3894	317.326
102315	Mexico	703	26	26.6244	1.94484	4.77369	26.5205	10.6757	11.9226	24.3636	4.08297	2.89211	3.79857	8.62528	0.935681	4.43893	1.55363	11.0973	11.0973	33.239	16.536	28.1872	128.723
102738	Mexico	760	26	32.1007	6.48261	21.6762	70.2958	45.6282	18.2146	74.4424	6.82248	6.82248	14.0464	44.6385	0.974641	11.6981	3.8146	18.3101	22.379	98.4546	59.2582	56.2018	366.246
104689	Mexico	963	26	32.5289	7.48085	28.1345	150.105	74.817	34.4894	81.3759	9.70196	10.1714	26.0462	43.9718	3.83384	15.7196	8.16603	18.3736	30.2143	185.72	67.679	72.4735	542.601
104974	Mexico	968	26	8.61496	3.28314	7.14567	31.2864	16.8441	7.92726	22.2718	11.1498	6.87571	8.86432	19.5121	1.28223	3.63656	6.06093	11.54	7.51555	41.7152	38.8199	28.753	165.196
107005	Mexico	983	26	8.20876	3.85583	14.3523	55.6954	20.3258	18.423	28.4719	13.81	11.955	24.0575	24.2191	2.67956	19.0925	6.58825	11.563	23.1261	73.9034	52.6637	60.3698	278.215
107043	Mexico	984	26	32.3871	10.4957	24.8968	108.618	60.3571	20.7537	43.8928	8.92486	5.40189	12.6336	21.1378	1.64405	5.20895	2.60447	10.1115	13.482	144.011	37.1086	31.4069	350.163
107108	Mexico	987	26	45.6209	17.7062	32.8213	160.22	106.099	35.4531	127.462	7.34127	7.20276	27.2728	59.6998	3.87841	16.8059	7.68012	20.0587	35.7803	210.747	78.1222	80.325	665.482
107252	Mexico	992	26	3.67454	1.59511	4.78534	26.3194	10.396	10.7566	28.0606	3.22319	4.45107	3.89438	21.1809	1.15114	3.50419	2.30275	5.10611	7.6091	32.6998	30.0063	18.5221	134.336
107289	Mexico	993	26	21.2229	2.79338	9.07849	47.4875	25.9363	9.55501	38.5613	5.87967	6.71963	8.52486	21.3348	2.85584	7.56115	5.25993	12.4923	16.4373	59.3594	36.79	41.7507	220.477
110928	Mexico	997	26	3.96944	5.37757	10.7551	46.1575	8.80491	10.7301	5.03658	5.17441	4.74321	4.37635	3.44961	nd	1.54702	nd	2.53149	2.25021	62.2902	13.3672	6.32872	110.934
107799	Mexico	1003	26	26.8047	9.49622	20.8186	115.598	58.8102	31.5903	36.2306	7.73169	11.949	22.1144	29.8725	4.04157	16.2766	7.79443	15.3596	31.6362	145.913	53.5947	71.0668	419.32
107913	Mexico	1005	26	29.1257	6.92467	24.1594	115.565	47.9332	60.3064	39.4022	4.44204	5.47852	11.5714	31.2424	1.62875	11.7835	5.98834	12.5562	20.4763	146.649	42.7917	50.8043	399.458
110980	Mexico	1014	26	9.42696	2.21048	14.7365	87.1911	15.3011	16.0824	11.5217	11.1075	6.61723	13.9116	18.4337	nd	8.94128	3.54568	13.4119	16.341	104.138	36.1585	42.2398	239.353
110502	Mexico	1017	26	18.9945	2.96705	16.022	66.0662	29.1958	22.4245	30.1571	7.8987	5.90024	12.9424	30.8335	1.23715	4.96616	1.48985	7.32509	10.9256	85.0553	45.8696	24.7067	250.351
110596	Mexico	1023	26	81.8721	21.2142	37.7141	191.29	127.383	34.0231	91.0827	9.77018	8.89785	25.144	26.5191	1.74468	15.7053	3.64182	15.4777	21.3957	250.218	46.9318	56.2205	631.003
110609	Mexico	1024	26	13.7577	1.05714	2.92401	31.0394	12.9346	6.81442	21.982	13.6348	4.54495	14.0579	12.9856	2.59711	nd	nd	2.17412	2.25883	35.0206	33.7625	4.43295	129.005
110872	Mexico	1035	26	47.1252	1.82488	9.788	80.9584	24.8046	17.1862	93.3893	7.18339	7.66228	26.5701	27.2969	0.478892	11.0376	4.47753	15.411	24.5743	92.5712	42.6214	55.5005	352.643
Average	China			30.2096	6.28955	33.6429	182.578	42.3185	29.8029	49.7804	8.0854	6.75229	12.712	51.2343	2.85551	5.76912	2.94392	6.61696	6.98524	222.511	68.2157	20.1427	445.483
Stdev	China			12.8712	4.24748	18.9051	98.2213	24.3527	13.7479	43.2622	3.65808	3.54395	7.10994	31.2092	2.21831	4.52466	2.07872	5.14622	5.78105	120.197	35.8411	16.5344	216.119
SEM	China			1.43905	0.474883	2.11366	10.9815	2.72271	1.53706	4.83686	0.408985	0.396225	0.794915	3.48929	0.248014	0.505873	0.232408	0.575364	0.646341	13.4385	4.00715	1.8486	24.1628
Min	China			6.83018	0.512095	11.0475	57.184	12.6022	7.36161	7.54565	1.27674	1.53209	0.950058	4.8687	0.608655	0.82202	0.796882	0.991855	0.66449	69.9863	20.692	0	153.217
25th percentile	China			19.9335	3.3515	19.7682	114.814	25.3903	19.178	23.5998	5.4357	4.85264	8.15406	29.6756	1.66577	2.37185	1.65596	3.00093	2.75425	139.735	43.1994	7.91276	274.115
Median	China			29.3336	5.38584	27.7263	163.713	36.7127	26.5759	40.1915	7.26463	5.96049	11.3521	44.6537	2.43313	4.57826	2.42155	4.70747	4.77272	202.484	61.055	14.6318	412.451
75th percentile	China			38.4365	8.49539	41.2057	233.631	57.1028	37.2274	61.7323	10.4544	7.9073	15.7157	68.1106	3.60173	7.54085	3.23443	8.28824	9.7716	285.601	89.4153	28.0407	575.584
Max	China			59.5706	26.5819	116.688	543.906	155.738	78.6203	314.437	20.7352	26.9126	39.4048	178.388	16.2756	24.7312	9.48029	22.7035	27.7196	687.175	225.608	78.0063	1367.58
n (out of 80)	China			80	80	80	80	80	80	80	80	80	80	79	78	75	40	78	78	80	80	80	80
Average	USA			28.9028	5.62174	15.8857	80.2997	30.871	23.1421	32.3328	6.80579	8.09838	19.3003	47.7632	3.21693	15.1344	6.84405	18.9264	23.4829	101.807	65.7637	63.307	336.283
Stdev	USA			14.4449	6.68121	8.96987	46.8277	17.1652	9.62566	23.1088	2.33363	3.89759	10.2977	40.7616	2.31429	9.3898	3.61506	10.0784	12.4109	58.2356	45.7292	34.5494	168.932
SEM	USA			1.61499	0.746982	1.00286	5.2355	1.91913	1.07618	2.58364	0.260908	0.435763	1.15131	4.55729	0.258746	1.04981	0.404176	1.1268	1.38758	6.51094	5.11268	3.86274	18.8872
Min	USA			5.24558	0.710252	2.36751	16.5726	4.76515	3.43089	4.43559	2.02425	2.74721	0.705133	2.97462	0.670533	2.03144	1.21886	3.1624	2.74075	19.6503	10.8998	5.90315	78.1557
25th percentile	Overall			18.5267	2.28489	9.42832	44.4867	18.8572	15.4343	14.4956	5.377	5.48905	11.0834	23.9189	1.63812	7.84467	3.63608	11.528	13.864	57.4738	37.5757	39.8679	201.186
Median	USA			28.7739	4.23842	13.5782	73.3677	28.0729	22.3012	24.6136	6.40534	7.21098	18.4472	35.6758	2.54736	13.4699	6.19265	17.2816	21.773	93.1828	55.0792	55.9995	330.118
75th percentile	Overall			35.7975	6.94079	19.8169	108.799	38.6266	28.9571	44.7075	8.07576	9.97397	25.5308	63.3082	4.06777	20.7769	9.23459	24.8744	33.0209	135.718	81.6073	85.8286	415.501
Max	USA			94.1025	55.664	50.9791	289.955	100.966	51.9202	114.154	16.4689	24.3324	45.4179	222.323	13.1087	40.3908	16.3867	47.4791	49.3666	358.106	266.47	138.148	949.491
n (out of 80)	USA			80	80	80	80	80	80	80	80	80	79	80	77	77	74	80	80	80	80	80	80
Average	Mexico			24.1713	5.43795	18.0748	84.7911	36.5698	20.2944	48.6084	8.13087	6.57296	14.5252	26.6682	2.64374	9.97213	5.14673	11.4162	15.7895	108.304	43.6853	41.0499	313.037
Stdev	Mexico			15.6615	5.24936	13.2918	62.9157	27.6171	12.6049	41.8959	3.4363	3.37118	9.34927	17.4632	2.36451	8.81442	4.00023	6.70836	10.9386	79.4038	22.7559	29.5188	194.218
SEM	Mexico			1.75101	0.586896	1.48607	7.03419	3.08768	1.40927	4.68411	0.38419	0.376909	1.04528	1.95244	0.26436	0.985483	0.447239	0.750017	1.22297	8.87762	2.54419	3.30031	21.7142
Min	Mexico			1.01781	0.498951	2.6672	11.3361	3.73143	3.19901	3.69436	2.82902	1.19888	0.521472	3.08506	0.478892	0.574974	1.17691	1.64805	1.60993	15.4584	13.1877	3.57504	61.4483
25th percentile	Overall			11.2142	2.31769	8.34692	44.3711	15.6346	11.4905	23.8407	5.62848	4.52379	7.7753	13.6929	1.2409	3.86664	2.44709	6.66227	7.74357	57.2548	28.9908	20.7604	172.69
Median	Mexico			23.6625	3.80341	14.5444	68.9584	26.7138	16.413	34.9686	7.40974	5.8804	13.0949	21.262	1.93458	7.75991	3.77864	10.8896	12.7265	87.6589	37.5333	33.7284	258.445
75th percentile	Overall			31.6866	6.51773	24.2908	113.697	49.7474	25.0197	70.8404	9.92945	7.67983	17.878	32.4518	2.8348	12.3484	6.65759	15.3725	22.6195	146.097	51.0877	57.2579	404.424
Max	Mexico			81.8721	29.6232	70.4938	362.305	127.383	60.3064	288.295	18.8793	18.017	50.4814	85.8136	15.0825	59.2655	26.7197	35.1575	63.8862	443.619	113.544	185.029	918.283
n (out of 80)	Mexico			80	80	80	80	80	80	80	80	80	80	80	70	77	66	80	80	80	80	80	80
Average	Overall			27.7612	5.78308	22.5345	115.89	36.5864	24.4131	43.5739	7.67402	7.14121	15.4967	41.8495	2.91331	10.3314	5.355	12.3678	15.4901	144.207	59.2215	41.4998	364.934
Stdev	Overall			14.5452	5.47368	16.3061	86.3627	23.8215	12.7107	37.9346	3.24117	3.65989	9.39535	33.0214	2.29924	8.75291	3.78333	9.11993	12.1444	105.196	37.5393	32.9374	201.713
SEM	Overall			0.938892	0.353325	1.05256	5.57469	1.53767	0.82047	2.44867	0.209217	0.236245	0.606467	2.13152	0.148415	0.564998	0.244213	0.588689	0.783916	6.79037	2.42315	2.1261	13.0205
Min	Overall			1.01781	0.498951	2.36751	11.3361	3.73143	3.19901	3.69436	1.27674	1.19888	0.521472	2.97462	0.478892	0.574974	0.796882	0.991855	0.66449	15.4584	10.8998	0	61.4483
25th percentile	Overall			18.4144	2.57911	11.128	54.7214	20.504	15.4094	18.1052	5.51383	4.79998	8.36394	19.5453	1.53209	3.75195	2.49575	4.84709	5.54045	69.9549	35.1628	15.5556	217.876
Median	Overall			26.7146	4.5561	18.1087	91.3738	30.0636	21.9873	33.7551	7.04397	6.39894	13.6839	32.575	2.28865	7.71806	4.21328	10.5926	12.571	114.362	49.4351	33.7284	328.507
75th percentile	Overall			35.8726	7.24796	28.9461	146.972	48.1059	31.6433	57.0578	9.20181	8.39987	20.3177	57.7276	3.61006	13.8066	7.09347	17.5772	23.03	179.533	73.0316	59.2906	462.983
Max	Overall			94.1025	55.664	116.688	543.906	155.738	78.6203	314.437	20.7352	26.9126	50.4814	222.323	16.2756	59.2655	26.7197	47.4791	63.8862	687.175	266.47	185.029	1367.58
n detected (out of 240)	Overall			240	240	240	240	240	240	240	240	240	239	239	225	229	180	238	238	240	240	240	240

## Sheet: by week and country
Mean (interquartile range) (nmol/L)
Sample	Median	Median	Median	Median	Median	Median	Median	Median	Median	Median	Median	Median
Country	China	China	China	China	Cincinatti	Cincinatti	Cincinatti	Cincinatti	Mexico	Mexico	Mexico	Mexico
study week	2	4	13	26	2	4	13	26	2	4	13	26
Fat (g/L)	38.7 (33.1-47.7)	25.7 (22.2-38.5)	22.6 (16.7-32.2)	23.7 (17.7-36.3)	30.3 (21.7-35.2)	33.3 (24.1-39.6)	28.6 (14.3-41.5)	18.6 (15.4-28.6)	30.4 (15.9-37.6)	20.4 (13.5-29.1)	22.7 (4.8-31.4)	23.9 (8.8-32.5)
cis-lutein	69.3 (48.8-109.2)	44.0 (32.2-77.6)	33.5 (25.4-44.0)	40.9 (29.4-70.4)	34.0 (17.8-42.7)	28.5 (19.6-34.5)	19.7 (17.1-35.5)	20.2 (13.5-32.5)	59.0 (23.8-101.4)	28.9 (13.3-45.0)	23.2 (17.4-37.0)	31.6 (17.2-51.0)
all-trans-lutein	237.0 (144.8-331.5)	179.7 (113.5-228.3)	120.9 (85.9-161.7)	151.3 (113.3-235.0)	84.7 (45.7-143.1)	75.9 (51.3-88.5)	65.8 (41.3-123.4)	71.1 (37.9-97.6)	116.3 (54.1-191.0)	72.1 (33.5-100.7)	54.6 (35.1-80.4)	75.6 (35.0-113.9)
all-trans-zeaxanthin	57.2 (29.8-72.3)	37.7 (28.0-59.5)	27.6 (19.6-38.4)	32.9 (23.0-54.1)	30.7 (20.6-50.0)	31.4 (22.7-35.2)	24.1 (15.7-43.4)	24.4 (13.7-37.1)	48.6 (20.0-81.0)	27.5 (12.2-44.4)	24.3 (14.5-36.3)	27.6 (13.5-58.7)
α-cryptoxanthin	37.7 (31.6-48.1)	23.1 (17.7-29.3)	19.6 (15.6-27.2)	28.0 (20.2-41.3)	23.1 (16.6-32.3)	20.9 (13.9-28.2)	21.4 (15.6-32.2)	18.7 (14.3-26.1)	27.5 (15.0-40.8)	16.9 (11.9-21.3)	12.7 (10.4-18.4)	16.6 (10.9-29.3)
β-cryptoxanthin	46.6 (26.6-78.2)	36.9 (15.6-51.5)	30.1 (15.5-54.5)	63.6 (33.3-95.4)	29.3 (15.1-51.1)	23.9 (16.6-38.7)	24.4 (13.5-48.5)	25.2 (11.7-48.9)	65.0 (32.1-98.1)	33.0 (19.1-55.0)	28.9 (14.3-54.0)	30.1 (22.8-66.8)
α-carotene	15.4 (11.5-22.5)	10.2 (8.2-14.3)	8.7 (5.1-14.4)	10.4 (7.1-13.5)	19.5 (13.6-27.1)	17.9 (10.2-22.5)	19.6 (11.6-27.2)	17.4 (9.1-24.1)	18.0 (12.9-31.3)	12.8 (6.2-17.0)	8.9 (6.4-13.8)	12.9 (8.2-23.6)
cis-β-carotene	18.4 (14.9-24.3)	14.5 (12.3-18.1)	16.1 (10.4-19.3)	17.1 (11.8-21.7)	16.7 (11.4-24.8)	15.7 (14.9-19.4)	17.3 (13.9-22.8)	15.0 (13.1-20.2)	18.8 (14.3-32.3)	14.7 (8.4-19.1)	14.5 (11.5-18.0)	15.6 (11.7-20.1)
all-trans-β-carotene	59.4 (33.7-76.9)	44.3 (28.6-62.4)	33.1 (21.8-42.2)	54.7 (34.4-76.2)	35.7 (27.0-63.9)	36.9 (18.9-60.8)	36.9 (19.7-71.0)	31.4 (22.3-64.9)	34.7 (19.2-62.4)	17.8 (13.1-31.6)	17.8 (13.0-27.4)	21.3 (14.3-30.6)
cis-lycopene	23.1 (13.0-30.5)	11.7 (4.7-16.4)	7.5 (4.3-14.4)	5.4 (4.1-12.2)	48.1 (32.2-75.0)	41.5 (28.0-59.4)	40.7 (22.4-64.8)	31.8 (20.6-56.3)	45.6 (18.1-68.9)	24.8 (11.7-32.5)	17.0 (13.8-25.0)	28.9 (14.3-40.6)
all-trans-lycopene	8.8 (5.0-15.7)	5.0 (3.4-8.1)	3.4 (2.7-8.1)	3.4 (1.8-6.3)	23.2 (14.5-31.2)	18.8 (13.0-23.3)	16.0 (10.6-25.5)	13.2 (9.8-22.8)	14.9 (7.1-20.4)	10.5 (4.7-15.2)	8.3 (6.5-12.1)	11.6 (6.7-15.4)
total carotenoids	601.3 (394.0-729.0)	425.6 (283.3-558.9)	291.5 (252.0-428.8)	401.6 (319.9-641.1)	366.4 (228.3-483.6)	333.7 (260.2-374.4)	289.0 (206.6-495.5)	302.2 (185.8-416.7)	487.9 (212.5-751.1)	262.4 (166.8-357.5)	222.3 (144.2-295.9)	279.1 (148.0-395.0)
